# Supplementary material
Source: MDPI journal article supplement (https://www.mdpi.com/2073-4344/12/11/1382)
Supplement: s1 [file s1]

Supplementary Materials

# Structural, Optical and Photocatalytic Properties of Mn Doped ZnO Nanoparticles Used as Photocatalysts for Azo-Dye Degradation under Visible Light

Imane Aadnan <sup>1</sup>, Omar Zegaoui <sup>1,\*</sup>, Abderrahim El Mragui <sup>1</sup>, Ikram Daou <sup>1</sup>, Hamou Moussout <sup>2</sup> and Joaquim C.G. Esteves da Silva <sup>3</sup>

<sup>1</sup> Research Team “Materials and Applied Catalysis: MCA”, CBAE Laboratory, URL-CNRST-13, Faculty of Sciences, Moulay Ismail University of Meknes, PO Box 11201 Zitoun, Meknès, Morocco

<sup>2</sup> Laboratory of Advanced Materials and Process Engineering, Faculty of Sciences, University Ibn Tofail, PO Box 133, Kenitra 14000, Morocco

<sup>3</sup> Centro de Investigação em Química (CIQUP), Instituto de Ciências Moleculares (IMS), Departamento de Geociências, Ambiente e Ordenamento do Território, Faculdade de Ciências, Universidade do Porto, Rua do Campo Alegre s/n, 4169-007 Porto, Portugal

\* Correspondence: o.zegaoui@umi.ac.ma

## Supplementary data

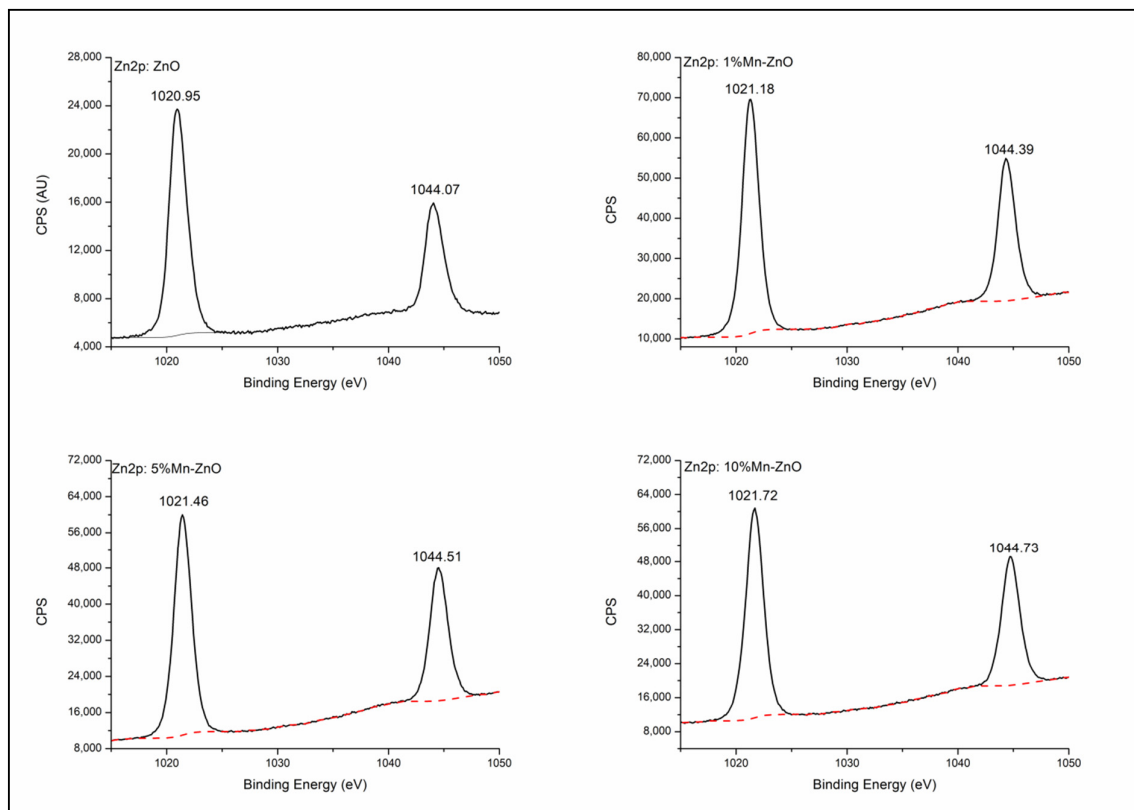

**Figure S1.** XPS spectra of Zn2p in the synthesized pure and Mn-doped ZnO nanomaterials.

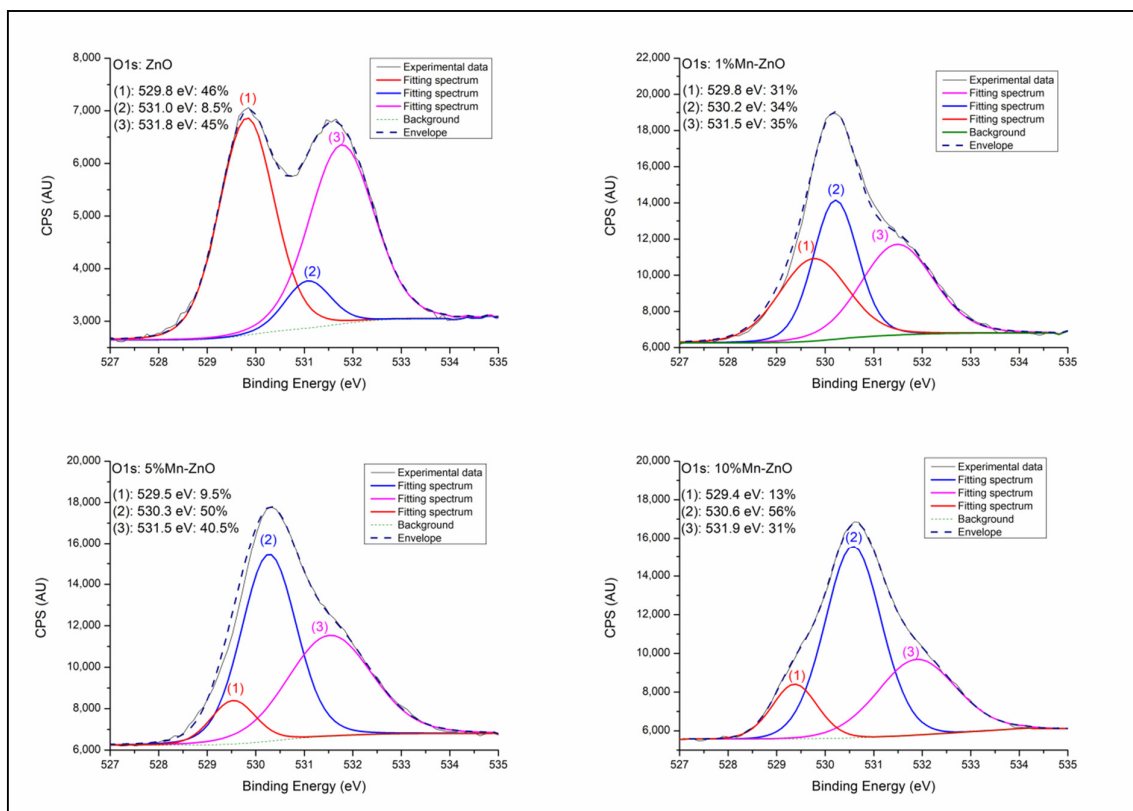

**Figure S2.** High-resolution XPS spectra of O1s in the synthesized pure and Mn-doped ZnO nano-materials.

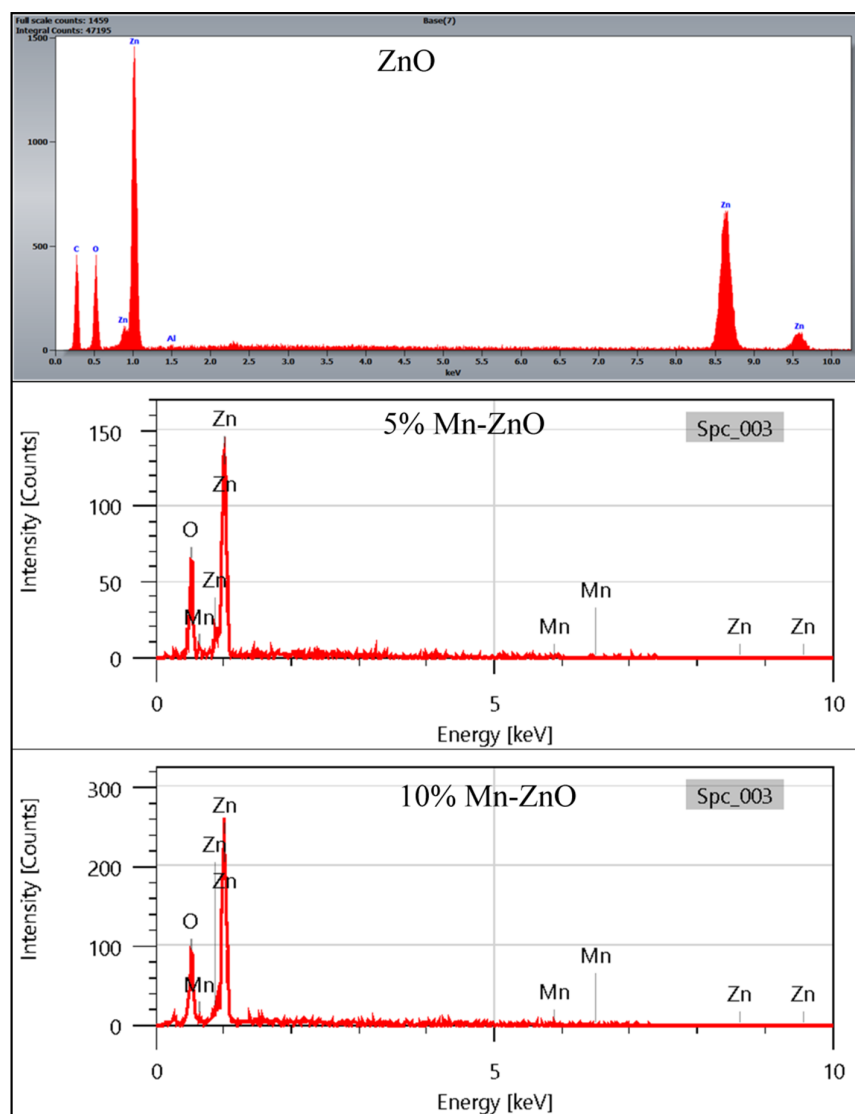

Figure S3. EDS spectra of ZnO and x%Mn-ZnO nanomaterials.
